# Supplementary material for: Quadruplex Real-Time TaqMan® RT-qPCR Assay for Differentiation of Equine Group A and B Rotaviruses and Identification of Group A G3 and G14 Genotypes
Source: MDPI journal article supplement (doi:10.3390/v15081626), 2023-07-26
Supplement: s1 [file s1]

**Supplementary Table S1.** Primers used for RT-PCR amplification and sequencing of VP7 (genome segment 9) of ERVA and VP6 (genome segment 6) of ERVB

| Primer name   | Target   | Nucleotide Position      | Sequence (5' to 3')       | Application           |
|---------------|----------|--------------------------|---------------------------|-----------------------|
| RVAVP7-Gra-5  | ERVA VP7 | 1-20 <sup>a</sup>        | GGCTTTAAAAGCGAGAATTT      | RT-PCR and sequencing |
| RVAVP7-Gra-3  | ERVA VP7 | 1,062-1,044 <sup>a</sup> | GGTCACATCATACTACTCT       | RT-PCR and sequencing |
| RVAVP7-389-R  | ERVA VP7 | 389-370 <sup>a</sup>     | CCAGTAGGCCATCCTTTAGT      | Sequencing            |
| RVAVP7-635-F  | ERVA VP7 | 635-659 <sup>a</sup>     | GTCCACTTAATACACAACTCTAGG  | Sequencing            |
| RVAVP7-241-R  | ERVA VP7 | 245-220 <sup>a</sup>     | GCAGTRTCCATTGAACCAGTAATTG | Sequencing            |
| RVAVP7-852-F  | ERVA VP7 | 856-879 <sup>a</sup>     | GAYATAACGGCTGATCCAACTACG  | Sequencing            |
| RVAVP7-881-F  | ERVA VP7 | 885-906 <sup>a</sup>     | CTCCACAGATTGGACGAATGA     | Sequencing            |
| RVBVP6-29-F   | ERVB VP6 | 29-48 <sup>b</sup>       | GTGAACGCTTGCGTCAGATT      | RT-PCR and sequencing |
| RVBVP6-1201-R | ERVB VP6 | 1,201-1,182 <sup>b</sup> | CGGGCTCAGGGAGAATCAGA      | RT-PCR and sequencing |
| RVBVP6-744-F  | ERVB VP6 | 744-763 <sup>b</sup>     | CCGCAGAGATGACAGCAGAT      | Sequencing            |
| RVBVP6-455-R  | ERVB VP6 | 455-436 <sup>b</sup>     | CTGGTTGGATAAGCGCGGTA      | Sequencing            |

<sup>a</sup>nucleotide position based on GenBank Accession number KM454508.1

<sup>b</sup>nucleotide position based on GenBank Accession number MZ327693.1
